# Supplementary material for: Metabolic syndrome agravates cardiovascular, oxidative and inflammatory dysfunction during the acute phase of Trypanosoma cruzi infection in mice
Source: PubMed Central journal article supplement (PMC6906468; doi:10.1038/s41598-019-55363-9), 2019-12-11

**Metabolic syndrome aggravates cardiovascular, oxidative and inflammatory dysfunction during the acute phase of *Trypanosoma cruzi* infection in mice**

Bruno Fernando Cruz Lucchetti<sup>1,4</sup>, Natalia Boaretto<sup>1</sup>, Fernanda Novi Cortegoso Lopes<sup>1</sup>, Aparecida Donizette Malvezi<sup>2</sup>, Maria Isabel Lovo Martins<sup>2</sup>, Vera Lúcia Hideko Tatakihara<sup>2</sup>, Victor Fattori<sup>2</sup>, Rito Santo Pereira<sup>2</sup>, Waldiceu Aparecido Verri Jr<sup>2</sup>, Eduardo Jose de Almeida Araujo<sup>3</sup>, Phileno Pinge-Filho<sup>2</sup>, Marli Cardoso Martins-Pinge<sup>1\*</sup>

1 Department of Physiological Sciences, Center of Biological Sciences, State University of Londrina, Londrina - PR, Brazil.

2 Department of Pathological Sciences, Center of Biological Sciences, State University of Londrina, Londrina - PR, Brazil.

3 Department of Histology, Center of Biological Sciences, State University of Londrina, Londrina - PR, Brazil.

4 Department of Physiotherapy, University Center of Araguaia Valley, Barra do Garças – MT, Brazil

\*Corresponding author: Marli C. Martins-Pinge, Ph.D.: Departamento de Ciências Fisiológicas, Centro de Ciências Biológicas, Universidade Estadual de Londrina; Rodovia Celso Garcia Cid, Km 380, Campus Universitário, CEP 86055-900, Londrina, PR, Brasil.

Phone.: +55 43 3371 5927

E-mail: martinspinge@uel.br (M.C. Martins-Pinge)

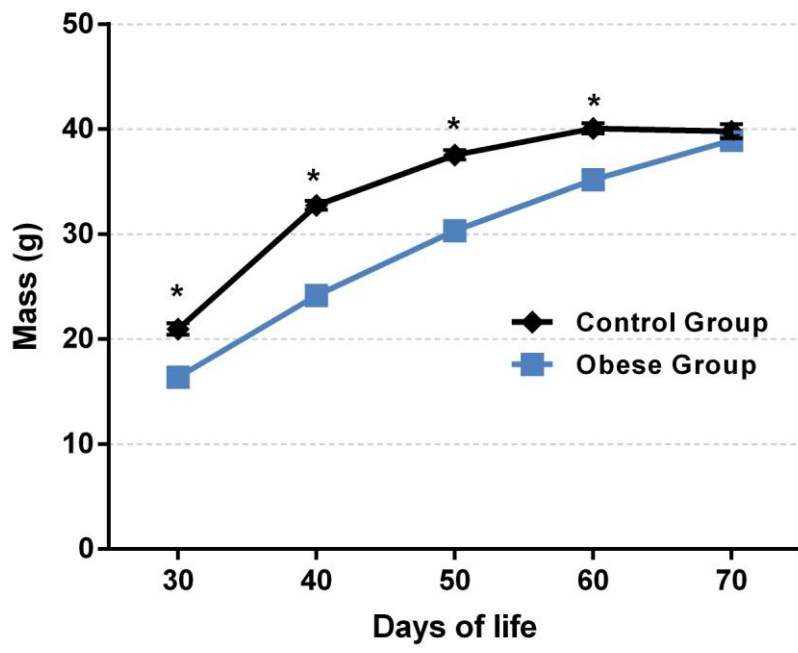

Supplement: 41598_2019_55363_MOESM1_ESM.pdf [file 41598_2019_55363_MOESM1_ESM.pdf]
